# Supplementary material for: An Analysis of Variability in the Content of Phenolic Acids and Flavonoids in Camelina Seeds Depending on Weather Conditions, Functional Form, and Genotypes
Source: MDPI journal article supplement (doi:10.3390/molecules27113364), 2022-05-24
Supplement: s1 [file s1]

## Supplementary material

### An analysis of variability in the content of phenolic acids and flavonoids in camelina seeds depending on weather conditions, functional form, and genotypes

Danuta Kurasiak-Popowska<sup>1</sup>, Małgorzata Graczyk<sup>2</sup>, Anna Przybylska-Balcerek<sup>3</sup>, Kinga Stuper-Szablewska<sup>3</sup>  
Lidia Sz wajkowska-Michałek<sup>3\*</sup>

Table S1. List of spring and winter accessions of *C. sativa* used in this study

|                        | Accession  | Plant name      | origin                    |
|------------------------|------------|-----------------|---------------------------|
| <b>Spring biotypes</b> |            |                 |                           |
| 1                      |            | UP 2017/02      | Poland                    |
| 2                      | Ames 31231 | GE2011-01       | Georgia                   |
| 3                      | Ames 31232 | GE2011-05       | Georgia                   |
| 4                      | PI 258366  | VNIIMK 17       | Former Soviet Union       |
| 5                      | PI 258367  | Voronezh349     | Former Soviet Union       |
| 6                      | PI 304268  | No. 401         | Sweden                    |
| 7                      | PI 304269  | No.402          | Sweden                    |
| 8                      | PI 304270  | No.403          | Sweden                    |
| 9                      | PI 304271  | No. 406         | Sweden                    |
| 10                     | PI 311735  | Borowska        | Poland                    |
| 11                     | PI 311736  | Przybrodzka     | Poland                    |
| 12                     | PI 597833  | 163-2073-72     | Denmark                   |
| 13                     | PI 633192  | CR 476/65       | Germany                   |
| 14                     | PI 633193  | CR 492/94a      | Germany                   |
| 15                     | PI 633194  | Giessen Nr. 3   | Germany                   |
| 16                     | PI 650140  | Came            | Germany                   |
| 17                     | PI 650141  | NU 52279        | US, Minnesota             |
| 18                     | PI 650142  | CS -163-2073-72 | Denmark                   |
| 19                     | PI 650143  | CS-CROO         | Germany                   |
| 20                     | PI 650145  | BRSCHW 28347    | Germany, Macklenburg-W.P. |
| 21                     | PI 650146  | BRSCHW 30021    | Sweden                    |
| 22                     | PI 650147  | Came            | Sweden                    |
| 23                     | PI 650148  | Giessen #3      | Germany, Macklenburg-W.P. |
| 24                     | PI 650149  | Giessen #4      | Germany, Macklenburg-W.P. |
| 25                     | PI 650150  | Hoga            | Denmark                   |
| 26                     | PI 650151  | Svalof          | Sweden                    |
| 27                     | PI 650152  | CPS-CAM23       | Germany                   |
| 28                     | PI 650153  | CPS-CAM10       | Former Soviet Union       |
| 29                     | PI 650154  | CSS-CAM25       | Former Soviet Union       |
| 30                     | PI 650155  | CSS-CAM27       | Poland                    |

|                        |           |                  |                     |
|------------------------|-----------|------------------|---------------------|
| 31                     | PI 650156 | CSS-CAM29        | Former Soviet Union |
| 32                     | PI 650157 | CSS-CAM30        | Former Soviet Union |
| 33                     | PI 650158 | CSS-CAM31        | Poland              |
| 34                     | PI 650159 | CSS-CAM33        | Poland              |
| 35                     | PI 650160 | CSS-CAM34        | Former Soviet Union |
| 36                     | PI 650161 | CSS- CAM35       | Former Soviet Union |
| 37                     | PI 650162 | CSS-CAM36        | Poland              |
| 38                     | PI 650163 | CSS-CAM37        | Former Soviet Union |
| 39                     | PI 650164 | CSS-CAM38        | Austria             |
| 40                     | PI 650165 | CSS-CAM7         | Former Soviet Union |
| 41                     | PI 650166 | CSS-CAM8         | Former Soviet Union |
| 42                     | PI 650167 | Index Seminum144 | Poland              |
| 43                     | PI 650168 | NE2006-1         | US, Nebraska        |
| 44                     | PI 652885 | 1                | Slovenia            |
| 45                     | PI 652886 | 4                | Slovenia            |
| 46                     |           | 1025             | Poland              |
| 47                     |           | 515              | Poland              |
| 48                     |           | 516              | Poland              |
| 49                     |           | 514              | Poland              |
| 50                     |           | 7                | Poland              |
| 51                     |           | 8III/2.          | Poland              |
| 52                     |           | 44               | Poland              |
| 53                     |           | 2                | Poland              |
| 54                     |           | L-3              | Poland              |
| 55                     |           | Omega            | Poland              |
| 56                     |           | Zarja Socializma | Ukraine             |
| 57                     |           | Zavolzkij        | Ukraine             |
| 58                     |           | GZPK             | Switzerland         |
| 59                     |           | Kirgzkij         | Ukraine             |
| 60                     |           | Sortandinskij    | Ukraine             |
| 61                     |           | Urkajinskij      | Ukraine             |
| 62                     |           | Omskij Mestnyj   | Ukraine             |
| 63                     |           | Grodziska        | Ukraine             |
| <b>Winter biotypes</b> |           |                  |                     |
| 64                     |           | Przybrodzka      | Poland              |
| 65                     |           | 14 2 2           | Poland              |
| 66                     |           | Luna             | Poland              |
| 67                     |           | Maczuga          | Poland              |
| 68                     |           | C5               | Poland              |
| 69                     |           | Lenka            | Poland              |
| 70                     |           | K 9/1            | Poland              |
| 71                     |           | 14/2/3           | Poland              |
| 72                     |           | K 10/1           | Poland              |
| 73                     |           | 15/2/2           | Poland              |
| 74                     |           | 15/2/3           | Poland              |

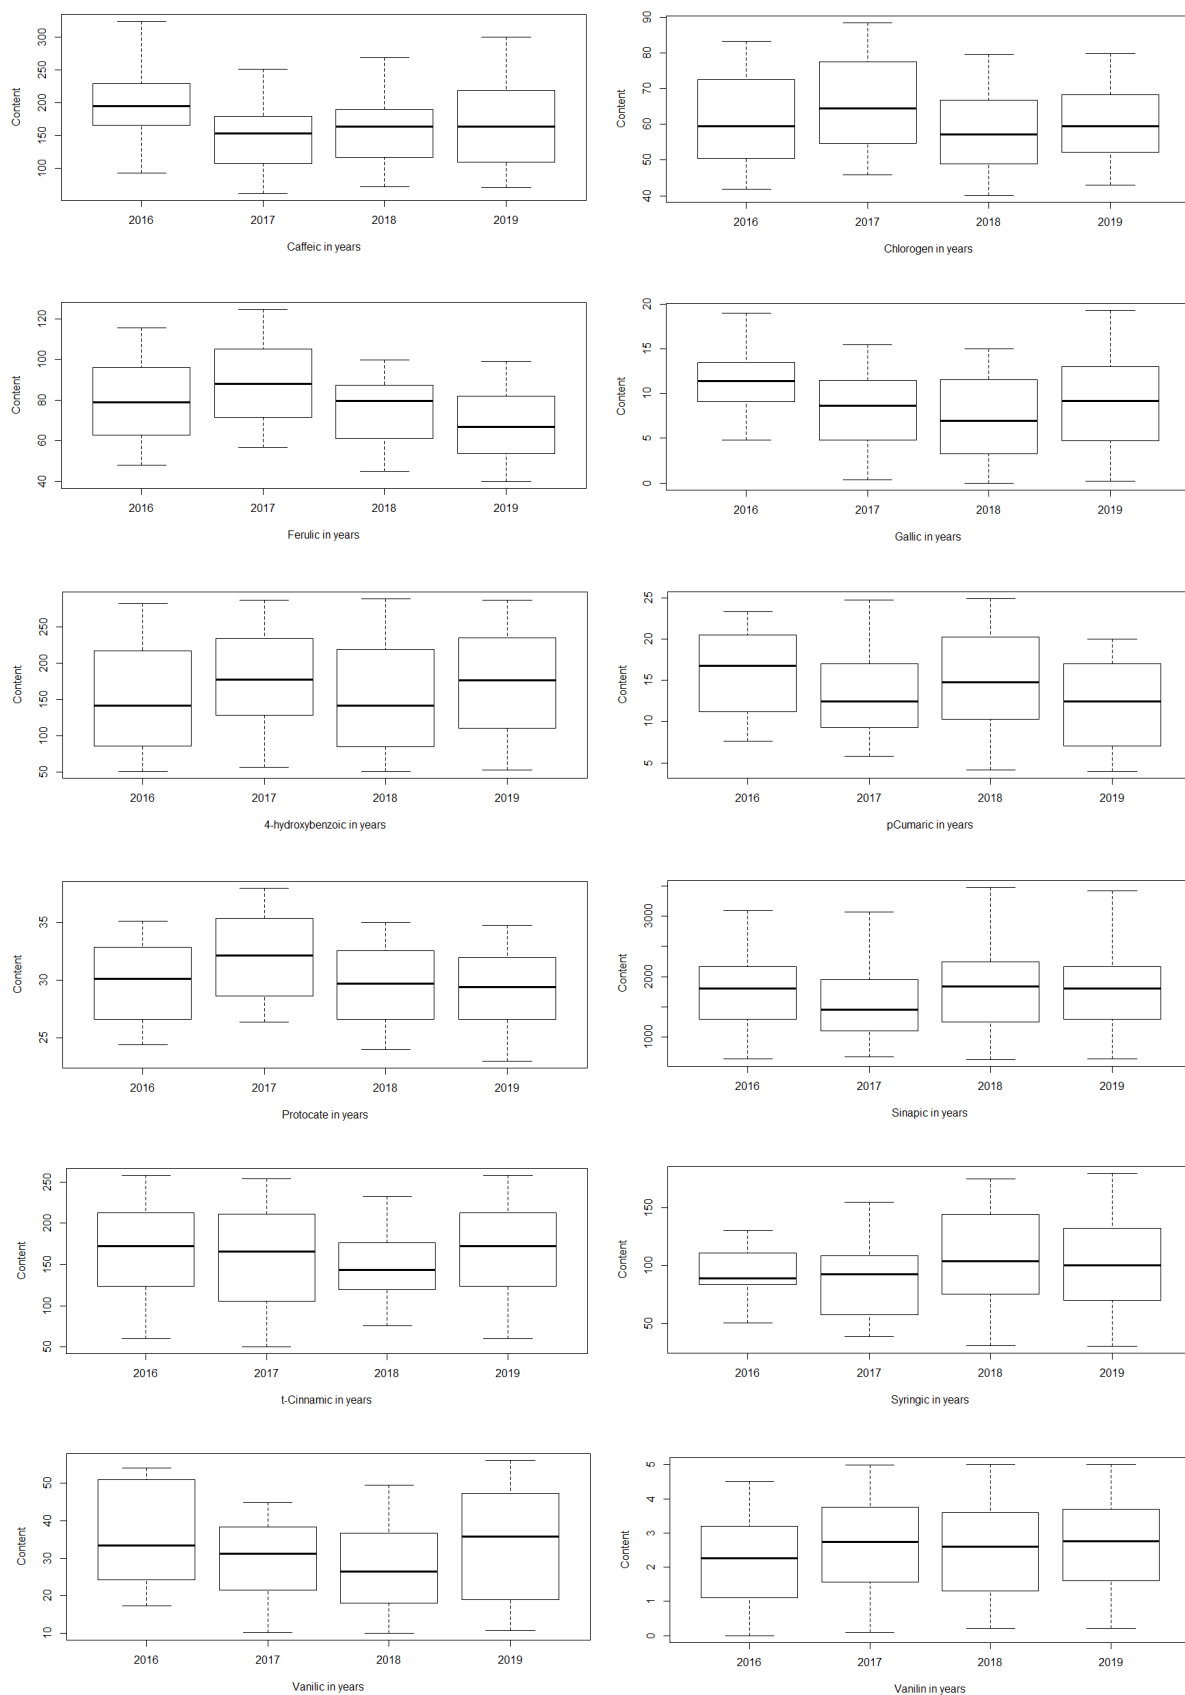

Figure S1. The boxplots for polyphenols and varieties

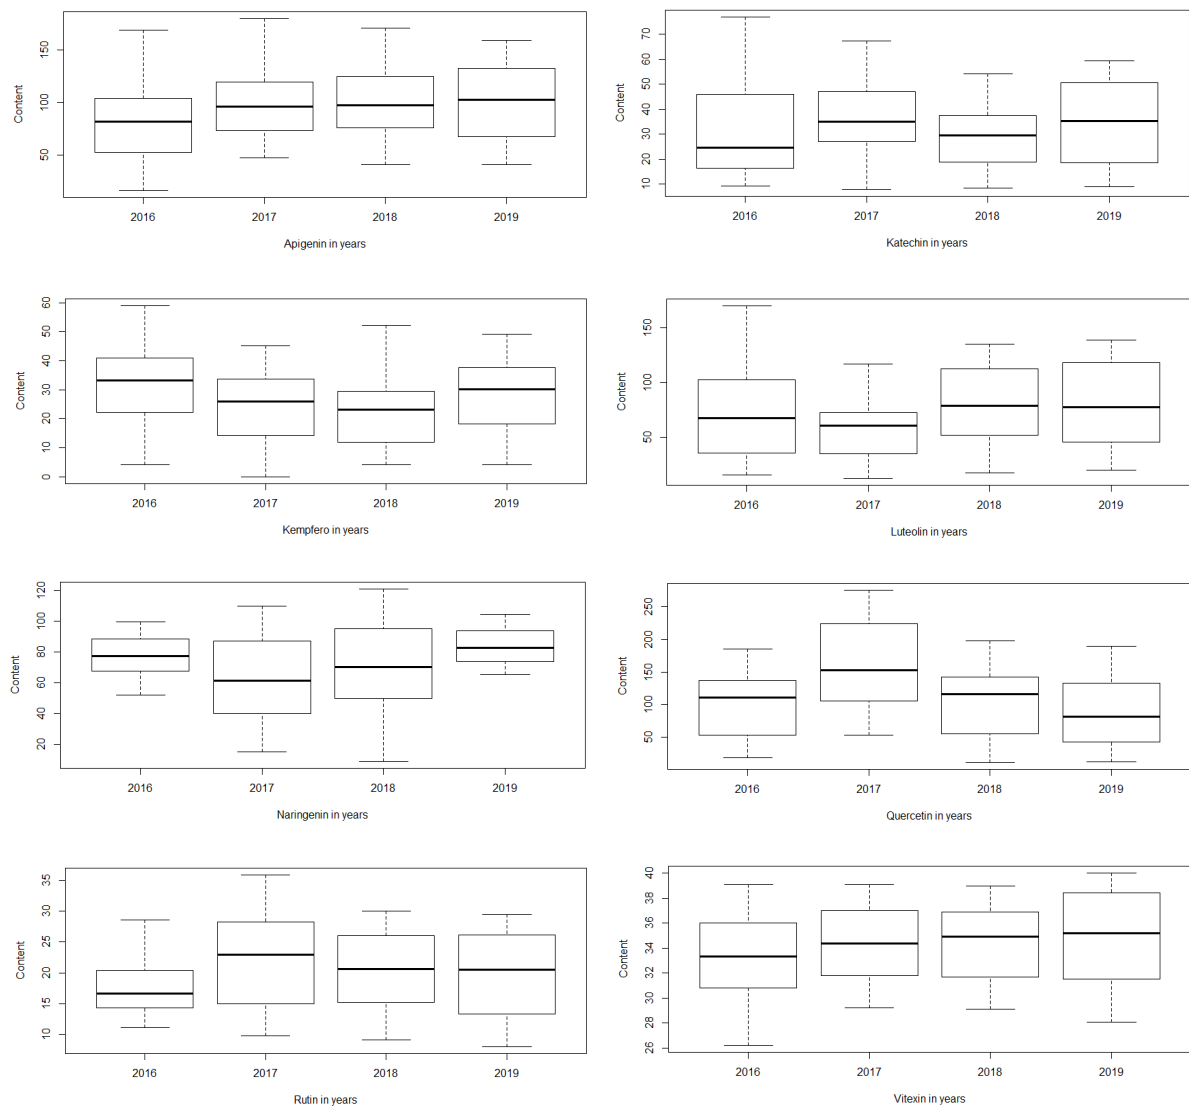

Figure S2. The boxplots for flavonoids and varieties
